# Supplementary material for: Limitations of rapid diagnostic tests in malaria surveys in areas with varied transmission intensity in Uganda 2017-2019: Implications for selection and use of HRP2 RDTs
Source: PubMed Central journal article supplement (PMC7774953; doi:10.1371/journal.pone.0244457), 2020-12-31
Supplement: pone.0244457.s004.pdf [file pone.0244457.s004.pdf]

| Region  | District    | Endemicity (MIS Parasite Rates) | Lat     | Lon      | Gender | Age | Barcode Label | Survey | RDT      | Microscopy | Density | Multiplex PCR | Parasite Species | p/ghrp2-/p/ghrp3+ | p/ghrp2+/p/ghrp3- | p/ghrp2-/p/ghrp3- |  |  |  |
|---------|-------------|---------------------------------|---------|----------|--------|-----|---------------|--------|----------|------------|---------|---------------|------------------|-------------------|-------------------|-------------------|--|--|--|
| Western | Bundibugyo  | Low                             | 0.62247 | 29.99602 | Female | 6   | G678          | 2      | Negative | Positive   | 48      | Positive      | Pm               |                   |                   |                   |  |  |  |
| Western | Bundibugyo  | Low                             | 0.62247 | 29.99602 | Male   | 4   | G679          | 2      | Negative | Positive   | 50      | Positive      | Pf/Po Mixed      |                   |                   |                   |  |  |  |
| Western | Bundibugyo  | Low                             | 0.72723 | 30.0716  | Female | 6   | G815          | 2      | Negative | Positive   | 240     | Positive      | Pf               |                   |                   |                   |  |  |  |
| Western | Isingiro    | Low                             | -0.9333 | 30.62278 | Male   | 10  | M267          | 2      | Negative | Positive   | 620     | Positive      | Po               |                   |                   |                   |  |  |  |
| Western | Mitooma     | Low                             | -0.7138 | 29.99587 | Male   | 5   | M426          | 2      | Negative | Positive   | 272     | Positive      | Pf               |                   |                   |                   |  |  |  |
| Western | Mitooma     | Low                             | -0.7132 | 29.9935  | Female | 3   | M425          | 2      | Negative | Positive   | 900     | Positive      | Pm               |                   |                   |                   |  |  |  |
| Western | Kiryandongo | Low                             | 1.80288 | 32.09757 | Male   | 4   | C220          | 2      | Negative | Positive   | 48      | Positive      | Pf               |                   |                   |                   |  |  |  |
| Western | Kiryandongo | Low                             | 2.21784 | 32.24252 | Female | 3   | C186          | 2      | Negative | Positive   | 280     | Negative      | neg              |                   |                   |                   |  |  |  |
| Western | Rubirizi    | Low                             | -0.2103 | 29.89598 | Female | 9   | M896          | 2      | Negative | Positive   | 240     | Negative      | neg              |                   |                   |                   |  |  |  |
| Western | Rubirizi    | Low                             | -0.2726 | 30.08051 | Female | 5   | M894          | 2      | Negative | Positive   | 96      | Negative      | neg              |                   |                   |                   |  |  |  |
| Western | Ntungamo    | Low                             | -0.9283 | 30.46065 | Female | 3   | N844          | 2      | Negative | Positive   | 64      | Positive      | Po/Pm Mixed      |                   |                   |                   |  |  |  |
| Western | Ntungamo    | Low                             | 1.43189 | 31.668   | Male   | 4   | C347          | 2      | Negative | Positive   | 700     | Positive      | Pf               |                   |                   |                   |  |  |  |
| Western | Masindi     | Low                             | 1.8396  | 31.71062 | Male   | 7   | C418          | 2      | Negative | Positive   | 400     | Positive      | Pf               |                   |                   |                   |  |  |  |
| Western | Masindi     | Low                             | 1.8229  | 31.70539 | Male   | 5   | C432          | 2      | Negative | Positive   | 680     | Positive      | Pf               |                   |                   |                   |  |  |  |
| Western | Masindi     | Low                             | 1.66146 | 31.72742 | Female | 3   | C587          | 2      | Negative | Positive   | 16      | Negative      | neg              |                   |                   |                   |  |  |  |
| Western | Kasese      | Low                             | 0.01103 | 29.89447 | Female | 7   | J446          | 2      | Negative | Positive   | 400     | Positive      | Pf               |                   |                   |                   |  |  |  |
| Western | Hoima       | Low                             | 1.59274 | 31.20671 | Male   | 5   | K161          | 2      | Negative | Positive   | 520     | Positive      | Pf               |                   |                   |                   |  |  |  |
| Western | Hoima       | Low                             | 1.67546 | 31.2552  | Female | 3   | K168          | 2      | Negative | Positive   | 600     | Positive      | Pf               |                   |                   |                   |  |  |  |
| Western | Hoima       | Low                             | 1.61789 | 31.34469 | Male   | 2   | K182          | 2      | Negative | Positive   | 448     | Positive      | Po               |                   |                   |                   |  |  |  |
| Western | Bushenyi    | Low                             | -0.4797 | 30.23892 | Male   | 3   | K917          | 2      | Negative | Positive   | 200     | Negative      | neg              |                   |                   |                   |  |  |  |
| Western | Kyegogwa    | Low                             | 0.65602 | 30.96918 | Female | 3   | P081          | 2      | Negative | Positive   | 800     | Positive      | Po               |                   |                   |                   |  |  |  |
| Western | Kyegogwa    | Low                             | 0.57756 | 31.25346 | Female | 2   | P132          | 2      | Negative | Positive   | 189     | Positive      | Po               |                   |                   |                   |  |  |  |
| Western | Kyegogwa    | Low                             | 0.67679 | 31.24993 | Female | 2   | P130          | 2      | Negative | Positive   | 340     | Positive      | Pm               |                   |                   |                   |  |  |  |
| Western | Kyegogwa    | Low                             | 0.40798 | 30.91181 | Female | 5   | P126          | 2      | Negative | Positive   | 900     | Positive      | Pf               |                   |                   |                   |  |  |  |
| Western | Kyenjojo    | Low                             | 0.69666 | 30.44282 | Female | 5   | P708          | 2      | Negative | Positive   | 760     | Positive      | Pm               |                   |                   |                   |  |  |  |
| Western | Kyenjojo    | Low                             | 0.80193 | 30.69989 | Male   | 2   | P681          | 2      | Negative | Positive   | 1400    | Positive      | Pm               |                   |                   |                   |  |  |  |
| Western | Kakumiro    | Low                             | 1.00833 | 31.37969 | Female | 4   | Q412          | 2      | Negative | Positive   | 1317    | Positive      | Pm               |                   |                   |                   |  |  |  |
| Western | Kakumiro    | Low                             | 1.01329 | 31.38019 | Female | 4   | Q414          | 2      | Negative | Positive   | 2167    | Positive      | Pm               |                   |                   |                   |  |  |  |
| Western | Kakumiro    | Low                             | 0.84734 | 31.4332  | Female | 5   | Q430          | 2      | Negative | Positive   | 79      | Positive      | Po               |                   |                   |                   |  |  |  |
| Western | Kagadi      | Low                             | 0.9874  | 30.68732 | Male   | 8   | Q598          | 2      | Negative | Positive   | 500     | Positive      | Pf               |                   |                   |                   |  |  |  |
| Western | Kagadi      | Low                             | 0.9874  | 30.68732 | Female | 4   | Q599          | 2      | Negative | Positive   | 32      | Positive      | Pf               |                   |                   |                   |  |  |  |
| Western | Kagadi      | Low                             | 0.96961 | 30.70639 | Female | 3   | Q593          | 2      | Negative | Positive   | 1040    | Positive      | Pf               |                   |                   |                   |  |  |  |
| Western | Kagadi      | Low                             | 1.04921 | 30.86949 | Female | 7   | Q560          | 2      | Negative | Positive   | 80      | Positive      | Pf               |                   |                   |                   |  |  |  |
| Western | Kagadi      | Low                             | 1.04989 | 30.68266 | Female | 7   | Q611          | 2      | Negative | Positive   | 520     | Positive      | Pf               |                   |                   |                   |  |  |  |
| Western | Kagadi      | Low                             | 0.87966 | 30.76955 | Male   | 4   | Q590          | 2      | Negative | Positive   | 450     | Positive      | Pf               |                   |                   |                   |  |  |  |
| Western | Kagadi      | Low                             | 0.87725 | 30.76946 | Female | 7   | Q588          | 2      | Negative | Positive   | 420     | Positive      | Pf               |                   |                   |                   |  |  |  |
| Western | Kagadi      | Low                             | 1.06004 | 30.77923 | Female | 4   | Q574          | 2      | Negative | Positive   | 100     | Positive      | Pf               |                   |                   |                   |  |  |  |
| Western | Kagadi      | Low                             | 1.00098 | 30.8118  | Male   | 9   | Q555          | 2      | Negative | Positive   | 920     | Positive      | Pf               |                   |                   |                   |  |  |  |
| Western | Kagadi      | Low                             | 1.0463  | 31.05806 | Male   | 5   | Q761          | 2      | Negative | Positive   | 680     | Positive      | Pf               |                   |                   |                   |  |  |  |
| Western | Kibaale     | Low                             | 0.67047 | 31.24347 | Male   | 2   | Q870          | 2      | Negative | Positive   | 200     | Positive      | Pf               |                   |                   |                   |  |  |  |
| Western | Kibaale     | Low                             | 0.67088 | 31.24102 | Male   | 10  | Q866          | 2      | Negative | Positive   | 96      | Positive      | Pm/Pf Mixed      |                   |                   |                   |  |  |  |
| Eastern | Namayingo   | Moderate                        | 0.24888 | 33.88823 | Male   | 9   | C865          | 2      | Negative | Positive   | 720     | Positive      | Pf               |                   |                   |                   |  |  |  |
| Eastern | Namayingo   | Moderate                        | 0.40494 | 33.91356 | Female | 6   | C882          | 2      | Negative | Positive   | 2080    | Positive      | Pf               |                   |                   |                   |  |  |  |
| Eastern | Namayingo   | Moderate                        | 0.32888 | 33.83743 | Female | 7   | C879          | 2      | Negative | Positive   | 880     | Positive      | Pf               |                   |                   |                   |  |  |  |
| Eastern | Soroti      | Low                             | 1.97246 | 33.45758 | Female | 10  | A459          | 2      | Negative | Positive   | 32      | Positive      | Pf               |                   |                   |                   |  |  |  |
| Eastern | Soroti      | Low                             | 1.69263 | 33.54998 | Female | 3   | A470          | 2      | Negative | Positive   | 2040    | Positive      | Pf               |                   |                   |                   |  |  |  |
| Eastern | Soroti      | Low                             | 1.89782 | 33.6072  | Female | 2   | A501          | 2      | Negative | Positive   | 96      | Positive      | Pf               |                   |                   |                   |  |  |  |
| Eastern | Soroti      | Low                             | 1.9022  | 33.61586 | Male   | 9   | A503          | 2      | Negative | Positive   | 720     | Positive      | Pf               |                   |                   |                   |  |  |  |
| Eastern | Soroti      | Low                             | 1.71087 | 33.63081 | Female | 2   | A611          | 2      | Negative | Positive   | 800     | Positive      | Pf               |                   |                   |                   |  |  |  |
| Eastern | Jinja       | Moderate                        | 0.57553 | 33.11237 | Female | 5   | D333          | 2      | Negative | Positive   | 420     | Positive      | Pf               |                   |                   |                   |  |  |  |
| Eastern | Kamuli      | Moderate                        | 0.73818 | 33.14342 | Female | 10  | D661          | 2      | Negative | Positive   | 1600    | Positive      | Pf               |                   |                   |                   |  |  |  |
| Eastern | Kamuli      | Moderate                        | 0.94905 | 33.12566 | Male   | 5   | D642          | 2      | Negative | Positive   | 155     | Positive      | Pf               |                   |                   |                   |  |  |  |
| Eastern | Busia       | Moderate                        | 0.49945 | 33.95853 | Female | 6   | D925          | 2      | Negative | Positive   | 300     | Positive      | Pf               |                   |                   |                   |  |  |  |
| Eastern | Busia       | Moderate                        | 0.42923 | 34.05726 | Male   | 8   | D940          | 2      | Negative | Positive   | 48      | Positive      | Pf               |                   |                   |                   |  |  |  |
| Eastern | Busia       | Moderate                        | 0.40895 | 34.02555 | Male   | 3   | E068          | 2      | Negative | Positive   | 32      | Positive      | Pf               |                   |                   |                   |  |  |  |
| Eastern | Busia       | Moderate                        | 0.49427 | 34.07887 | Female | 3   | E098          | 2      | Negative | Positive   | 1680    | Positive      | Pf               |                   |                   |                   |  |  |  |
| Eastern | Iganga      | Moderate                        | 0.62189 | 33.61959 | Female | 9   | E222          | 2      | Negative | Positive   | 760     | Positive      | Pf               |                   |                   |                   |  |  |  |
| Eastern | Iganga      | Moderate                        | 0.59509 | 33.64493 | Female | 4   | E264          | 2      | Negative | Positive   | 680     | Positive      | Pf               |                   |                   |                   |  |  |  |
| Eastern | Iganga      | Moderate                        | 0.56765 | 33.58038 | Male   | 7   | E271          | 2      | Negative | Positive   | 208     | Positive      | Pf               |                   |                   |                   |  |  |  |
| Eastern | Iganga      | Moderate                        | 0.61142 | 33.47232 | Female | 10  | E438          | 2      | Negative | Positive   | 80      | Negative      | neg              |                   |                   |                   |  |  |  |
| Eastern | Iganga      | Moderate                        | 0.59163 | 33.42295 | Female | 4   | E506          | 2      | Negative | Positive   | 110     | Positive      | Pf               |                   |                   |                   |  |  |  |
| Eastern | Luwero      | Moderate                        | 1.02032 | 33.32933 | Male   | 2   | E822          | 2      | Negative | Positive   | 480     | Positive      | Pf               |                   |                   |                   |  |  |  |
| Eastern | Ngora       | Low                             | 1.61531 | 33.87298 | Male   | 6   | A840          | 2      | Negative | Positive   | 1120    | Positive      | Pf               |                   |                   |                   |  |  |  |
| Eastern | Sironko     | Low                             | 1.20925 | 34.29622 | Female | 9   | A905          | 2      | Negative | Positive   | 560     | Positive      | Pf               |                   |                   |                   |  |  |  |
| Eastern | Mavuge      | Moderate                        | 0.3729  | 33.63943 | Male   | 5   | F410          | 2      | Negative | Positive   | 16      | Negative      | neg              |                   |                   |                   |  |  |  |
| Eastern | Mavuge      | Moderate                        | 0.53103 | 33.5207  | Female | 5   | F422          | 2      | Negative | Positive   | 144     | Positive      | Pf               |                   |                   |                   |  |  |  |
| Eastern | Mavuge      | Moderate                        | 0.22835 | 33.44653 | Female | 4   | F644          | 2      | Negative | Positive   | 304     | Positive      | Pf               |                   |                   |                   |  |  |  |
| Eastern | Mbale       | Low                             | 1.14328 | 34.15998 | Female | 9   | G024          | 2      | Negative | Positive   | 1680    | Positive      | Pf               |                   |                   |                   |  |  |  |
| Eastern | Mbale       | Low                             | 0.91626 | 34.15684 | Male   | 2   | G236          | 2      | Negative | Positive   | 64      | Positive      | Pf               |                   |                   |                   |  |  |  |
| Eastern | Mbale       | Low                             | 1.08038 | 34.15427 | Male   | 2   | G312          | 2      | Negative | Positive   | 2520    | Positive      | Pm               |                   |                   |                   |  |  |  |
| Eastern | Manafwa     | Low                             | 0.89878 | 34.32378 | Male   | 2   | B547          | 2      | Negative | Positive   | 1501    | Negative      | neg              |                   |                   |                   |  |  |  |
| Eastern | Manafwa     | Low                             | 0.85833 | 34.26184 | Female | 4   | B731          | 2      | Negative | Positive   | 1400    | Positive      | Pf               |                   |                   |                   |  |  |  |
| Eastern | Manafwa     | Low                             | 0.88981 | 34.31717 | Female | 2   | B690          | 2      | Negative | Positive   | 880     | Negative      | neg              |                   |                   |                   |  |  |  |
| Eastern | Manafwa     | Low                             | 0.91836 | 34.2992  | Male   | 5   | B666          | 2      | Negative | Positive   | 600     | Positive      | Pf               |                   |                   |                   |  |  |  |
| Eastern | Buyende     | Moderate                        | 1.1376  | 33.33199 | Female | 4   | G560          | 2      | Negative | Positive   | 3840    | Positive      | Pf               |                   |                   |                   |  |  |  |
| Western | Kyegogwa    | Low                             | 1.80158 | 32.08829 | Male   | 10  | C217          | 2      | Negative | Positive   | 860     | Positive      | Pf               |                   |                   |                   |  |  |  |
| Western | Kyegogwa    | Low                             | 0.31296 | 30.0839  | Female | 6   | J755          | 1      | Negative | Positive   | 640     | Negative      | neg              |                   |                   |                   |  |  |  |
| Eastern | Kanungu     | Low                             | 0.99022 | 34.32096 | Male   | 6   | B705          | 1      | Negative | Positive   | 3280    | Positive      | Pf               |                   |                   |                   |  |  |  |
| Western | Kisoro      | Low                             | 1.20718 | 31.13083 | Male   | 7   | K314          | 2      | Negative | Positive   | 2560    | Positive      | Pf               |                   |                   |                   |  |  |  |
| Western | Rukungiri   | Low                             | 1.04921 | 30.86949 | Female | 7   | Q561          | 2      | Negative | Positive   | 6640    | Positive      | Pf               |                   |                   |                   |  |  |  |
| Eastern | Iganga      | Low                             | 0.39884 | 34.08573 | Male   | 9   | E095          | 2      | Negative | Positive   | 400     | Positive      | Pf               |                   |                   |                   |  |  |  |
| Eastern | Namayingo   | Low                             | 1.11116 | 34.23027 | Female | 2   | G077          | 2      | Negative | Positive   | 6560    | Positive      | Pf               |                   |                   |                   |  |  |  |
| Eastern | Bukedea     | Low                             | 1.23831 | 34.23294 | Female | 6   | B058          | 2      | Negative | Positive   | 288     | Positive      | Pf               |                   |                   |                   |  |  |  |
| Western | Bukedea     | Low                             | 1.04725 | 31.05393 | Male   | 5   | Q765          | 2      | Negative | Positive   | 7440    | Positive      | Pf               |                   |                   |                   |  |  |  |
| Eastern | Bulambuli   | Low                             | 1.28613 | 34.31809 | Female | 2   | B217          | 1      | Negative | Positive   | 16      | Positive      | Pf               |                   |                   |                   |  |  |  |
| Eastern | Bukedea     | Low                             | 1.25063 | 34.21516 | Male   | 4   | B426          | 1      | Negative | Positive   | 780     | Positive      | Pf               |                   |                   |                   |  |  |  |
| Eastern | Bulambuli   | Low                             | 1.31678 | 34.27852 | Female | 7   | B265          | 1      | Negative | Positive   | 112     | Negative      | neg              |                   |                   |                   |  |  |  |
| Eastern | Bukedea     | Low                             | 1.3692  | 34.09668 | Male   | 4   | B431          | 1      | Negative | Positive   | 800     | Positive      | Pf               |                   |                   |                   |  |  |  |



|         |            |          |         |          |        |    |      |   |          |          |       |          |             |  |  |  |  |  |  |
|---------|------------|----------|---------|----------|--------|----|------|---|----------|----------|-------|----------|-------------|--|--|--|--|--|--|
| Western | Bundibugyo | Low      | 0.72849 | 30.07015 | Male   | 10 | G834 | 1 | Negative | Positive | 96    | Postive  | Pf          |  |  |  |  |  |  |
| Western | Isingiro   | Low      | -0.9391 | 30.74714 | Male   | 2  | M262 | 1 | Negative | Positive | 440   | Postive  | Pf/Pv Mixed |  |  |  |  |  |  |
| Western | Kibaale    | Low      | 0.94055 | 31.15371 | Male   | 8  | Q304 | 1 | Negative | Positive | 3360  | Postive  | Pm          |  |  |  |  |  |  |
| Western | Kibaale    | Low      | 0.79454 | 31.30346 | Male   | 4  | Q267 | 1 | Negative | Positive | 920   | Negative | neg         |  |  |  |  |  |  |
| Western | Ibanda     | Low      | -0.019  | 30.42023 | Female | 7  | J080 | 1 | Negative | Positive | 1360  | Postive  | Pm          |  |  |  |  |  |  |
| Western | Kyenjojo   | Low      | 0.80028 | 30.69302 | Female | 6  | P664 | 1 | Negative | Positive | 50    | Postive  | Pf          |  |  |  |  |  |  |
| Western | Kamwengeye | Low      | 0.19126 | 30.44243 | Male   | 2  | N287 | 1 | Negative | Positive | 16    | Postive  | Pf          |  |  |  |  |  |  |
| Western | Kiruhura   | Low      | 0.05071 | 30.62056 | Male   | 8  | J122 | 1 | Negative | Positive | 80    | Postive  | Pf          |  |  |  |  |  |  |
| Western | Ntungamo   | Low      | -0.9275 | 30.51144 | Female | 3  | N860 | 1 | Negative | Positive | 1920  | Postive  | Pm          |  |  |  |  |  |  |
| Western | Bundibugyo | Low      | 0.7958  | 30.12497 | Female | 9  | G988 | 1 | Negative | Positive | 220   | Negative | neg         |  |  |  |  |  |  |
| Western | Isingiro   | Low      | -0.7953 | 30.81986 | Male   | 7  | M133 | 1 | Negative | Positive | 1620  | Postive  | Pm          |  |  |  |  |  |  |
| Western | Buhweiu    | Low      | -0.3065 | 30.33511 | Male   | 2  | R030 | 1 | Negative | Positive | 160   | Postive  | Pf          |  |  |  |  |  |  |
| Western | Busia      | Moderate | -0.8062 | 29.77975 | Male   | 5  | P358 | 1 | Negative | Positive | 620   | Postive  | Pf          |  |  |  |  |  |  |
| Western | Bundibugyo | Low      | 0.70997 | 29.99645 | Female | 9  | G768 | 1 | Negative | Positive | 32    | Postive  | Pf          |  |  |  |  |  |  |
| Western | Kiruhura   | Low      | -0.1627 | 30.63112 | Male   | 5  | J307 | 1 | Negative | Positive | 96    | Negative | neg         |  |  |  |  |  |  |
| Western | Kibaale    | Low      | 0.66325 | 31.18703 | Male   | 10 | Q875 | 1 | Negative | Positive | 112   | Postive  | Pm          |  |  |  |  |  |  |
| Western | Ntungamo   | Low      | -0.9304 | 30.51215 | Male   | 9  | N862 | 1 | Negative | Positive | 400   | Postive  | Pf          |  |  |  |  |  |  |
| Western | Ntungamo   | Low      | -1.0148 | 30.39931 | Male   | 7  | N782 | 1 | Negative | Positive | 640   | Postive  | Pm          |  |  |  |  |  |  |
| Western | Iganga     | Moderate | 0.78334 | 31.3256  | Male   | 2  | O253 | 1 | Negative | Positive | 400   | Postive  | Pf          |  |  |  |  |  |  |
| Western | Rukunqiri  | Low      | -0.7866 | 29.82745 | Male   | 7  | P374 | 1 | Negative | Positive | 288   | Postive  | Pf          |  |  |  |  |  |  |
| Western | Ibanda     | Low      | -0.2268 | 30.58531 | Male   | 6  | J026 | 1 | Negative | Positive | 1400  | Postive  | Pf/Pm Mixed |  |  |  |  |  |  |
| Western | Ibanda     | Low      | 0.71424 | 30.35763 | Female | 10 | L244 | 1 | Negative | Positive | 336   | Negative | neg         |  |  |  |  |  |  |
| Western | Rukunqiri  | Low      | 0.5976  | 29.85857 | Female | 3  | P368 | 1 | Negative | Positive | 660   | Postive  | Pf          |  |  |  |  |  |  |
| Western | Bundibugyo | Low      | 0.72753 | 30.07217 | Female | 7  | G945 | 1 | Negative | Positive | 520   | Postive  | Pf          |  |  |  |  |  |  |
| Western | Kamwengeye | Low      | 0.3963  | 30.47288 | Female | 3  | N243 | 1 | Negative | Positive | 460   | Postive  | Pm/Po Mixed |  |  |  |  |  |  |
| Western | Kasese     | Low      | 0.08882 | 30.04734 | Female | 10 | J821 | 1 | Negative | Positive | 144   | Postive  | Pf          |  |  |  |  |  |  |
| Western | Kyenjojo   | Low      | 0.45518 | 30.60132 | Female | 10 | P814 | 1 | Negative | Positive | 820   | Postive  | Pm          |  |  |  |  |  |  |
| Western | Kibaale    | Low      | 1.15064 | 31.17137 | Female | 6  | Q319 | 1 | Negative | Positive | 1120  | Postive  | Pf          |  |  |  |  |  |  |
| Western | Kyenjojo   | Low      | 0.45518 | 30.60132 | Female | 4  | P816 | 1 | Negative | Positive | 1680  | Postive  | Pm          |  |  |  |  |  |  |
| Western | Kiruhura   | Low      | 0.00901 | 30.65546 | Male   | 4  | J132 | 1 | Negative | Positive | 720   | Postive  | Pf          |  |  |  |  |  |  |
| Western | Rukunqiri  | Low      | -0.7956 | 29.92402 | Female | 7  | P510 | 1 | Negative | Positive | 180   | Postive  | Pf          |  |  |  |  |  |  |
| Eastern | Busia      | Moderate | 1.31714 | 34.25734 | Female | 2  | B204 | 1 | Negative | Positive | 32    | Postive  | Pf          |  |  |  |  |  |  |
| Eastern | Busia      | Moderate | 1.31642 | 34.27808 | Female | 4  | B262 | 1 | Negative | Positive | 144   | Postive  | Pf          |  |  |  |  |  |  |
| Eastern | Busia      | Moderate | 1.43814 | 34.0597  | Male   | 7  | B461 | 1 | Negative | Positive | 208   | Postive  | Pf          |  |  |  |  |  |  |
| Western | Kasese     | Low      | -0.7166 | 30.85848 | Male   | 7  | M195 | 1 | Negative | Positive | 880   | Postive  | Pf          |  |  |  |  |  |  |
| Western | Kasese     | Low      | 2.18229 | 31.39256 | Female | 10 | C083 | 1 | Negative | Positive | 120   | Postive  | Pm          |  |  |  |  |  |  |
| Western | Kisoro     | Low      | -0.5942 | 30.10345 | Female | 10 | K811 | 1 | Negative | Positive | 144   | Postive  | Pf          |  |  |  |  |  |  |
| Western | Mayuge     | Moderate | -0.3446 | 30.51731 | Female | 6  | L583 | 1 | Negative | Positive | 4480  | Postive  | Pf          |  |  |  |  |  |  |
| Eastern | Mbale      | Low      | 0.73642 | 33.06217 | Male   | 6  | D732 | 1 | Negative | Positive | 1120  | Postive  | Pf          |  |  |  |  |  |  |
| Eastern | Mbale      | Low      | 0.56952 | 33.11245 | Female | 5  | D342 | 1 | Negative | Positive | 1251  | Postive  | Pf          |  |  |  |  |  |  |
| Eastern | Bugiri     | Moderate | 0.46794 | 34.06332 | Female | 5  | D915 | 1 | Negative | Positive | 520   | Postive  | Pf          |  |  |  |  |  |  |
| Eastern | Luuika     | Moderate | 0.5695  | 33.40768 | Male   | 2  | E883 | 1 | Positive | Positive | 520   | Postive  | Pf          |  |  |  |  |  |  |
| Eastern | Iganga     | Moderate | 0.68594 | 33.44875 | Female | 6  | E678 | 1 | Positive | Positive | 800   | Negative | neg         |  |  |  |  |  |  |
| Eastern | Iganga     | Moderate | 0.71922 | 33.51451 | Male   | 4  | E697 | 1 | Positive | Positive | 8560  | Postive  | Pf          |  |  |  |  |  |  |
| Eastern | Iganga     | Moderate | 0.76666 | 33.41236 | Male   | 3  | E574 | 1 | Positive | Positive | 41960 | Postive  | Pf          |  |  |  |  |  |  |
| Eastern | Iganga     | Moderate | 0.58717 | 33.42425 | Male   | 2  | E508 | 1 | Positive | Positive | 4040  | Postive  | Pf          |  |  |  |  |  |  |
| Eastern | Iganga     | Moderate | 0.61087 | 33.47172 | Female | 10 | E418 | 1 | Positive | Positive | 112   | Postive  | Pf          |  |  |  |  |  |  |
| Eastern | Iganga     | Moderate | 0.62231 | 33.47476 | Male   | 6  | E367 | 1 | Positive | Positive | 12000 | Postive  | Pf          |  |  |  |  |  |  |
| Eastern | Iganga     | Moderate | 0.70025 | 33.65549 | Male   | 2  | E236 | 1 | Positive | Positive | 32160 | Postive  | Pf          |  |  |  |  |  |  |
| Eastern | Iganga     | Moderate | 0.66877 | 33.61203 | Male   | 6  | E216 | 1 | Positive | Positive | 144   | Postive  | Pf          |  |  |  |  |  |  |
| Eastern | Buyende    | Moderate | 1.3994  | 32.87886 | Male   | 8  | G490 | 1 | Positive | Positive | 6480  | Negative | neg         |  |  |  |  |  |  |
| Eastern | Buyende    | Moderate | 1.29636 | 32.95131 | Male   | 5  | G541 | 1 | Positive | Positive | 440   | Postive  | Pf          |  |  |  |  |  |  |
| Eastern | Kamuli     | Moderate | 0.8438  | 33.04163 | Male   | 7  | D738 | 1 | Positive | Positive | 2280  | Postive  | Pf          |  |  |  |  |  |  |
| Eastern | Kamuli     | Moderate | 0.73537 | 33.15161 | Male   | 4  | D653 | 1 | Positive | Positive | 2320  | Postive  | Pf          |  |  |  |  |  |  |
| Eastern | Kamuli     | Moderate | 0.90963 | 33.18792 | Female | 4  | D487 | 1 | Positive | Positive | 3587  | Postive  | Pf          |  |  |  |  |  |  |
| Eastern | Kamuli     | Moderate | 1.00761 | 32.95409 | Male   | 6  | D526 | 1 | Positive | Positive | 2691  | Postive  | Pf          |  |  |  |  |  |  |
| Eastern | Jinja      | Moderate | 0.65546 | 33.26528 | Male   | 3  | D371 | 1 | Positive | Positive | 16477 | Postive  | Pf          |  |  |  |  |  |  |
| Eastern | Jinja      | Moderate | 0.57578 | 33.1126  | Female | 5  | D337 | 1 | Positive | Positive | 3670  | Postive  | Pf          |  |  |  |  |  |  |
| Eastern | Jinja      | Moderate | 0.43452 | 33.22061 | Male   | 5  | D224 | 1 | Positive | Positive | 1840  | Postive  | Pf          |  |  |  |  |  |  |
| Eastern | Jinja      | Moderate | 0.44962 | 33.23126 | Male   | 7  | D236 | 1 | Positive | Positive | 13200 | Postive  | Pf          |  |  |  |  |  |  |
| Western | Kibaale    | Low      | 1.00718 | 31.18097 | Male   | 7  | O325 | 1 | Positive | Positive | 5600  | Postive  | Pf          |  |  |  |  |  |  |
| Western | Kibaale    | Low      | 1.02944 | 30.68962 | Female | 2  | O676 | 1 | Positive | Positive | 480   | Postive  | Pf          |  |  |  |  |  |  |
| Western | Kibaale    | Low      | 0.98518 | 30.68682 | Female | 7  | O562 | 1 | Positive | Positive | 4980  | Postive  | Pf          |  |  |  |  |  |  |
| Western | Kibaale    | Low      | 1.09107 | 31.2908  | Male   | 6  | O291 | 1 | Positive | Positive | 1160  | Postive  | Po          |  |  |  |  |  |  |
| Eastern | Bulambuli  | Low      | 1.45505 | 34.40991 | Female | 7  | B222 | 1 | Positive | Positive | 4600  | Postive  | Po          |  |  |  |  |  |  |
| Eastern | Bulambuli  | Low      | 1.35601 | 34.26838 | Female | 2  | B281 | 1 | Positive | Positive | 33600 | Postive  | Pf          |  |  |  |  |  |  |
| Eastern | Mbale      | Low      | 1.11081 | 34.25349 | Male   | 5  | G010 | 1 | Positive | Positive | 32    | Postive  | Pf          |  |  |  |  |  |  |
| Eastern | Mbale      | Low      | 1.11054 | 34.23028 | Female | 7  | G026 | 1 | Positive | Positive | 880   | Postive  | Pf          |  |  |  |  |  |  |
| Eastern | Busia      | Moderate | 0.47449 | 34.10467 | Male   | 3  | D758 | 1 | Positive | Positive | 84000 | Postive  | Pf          |  |  |  |  |  |  |
| Eastern | Busia      | Moderate | 0.55447 | 34.12655 | Male   | 6  | D936 | 1 | Positive | Positive | 6000  | Postive  | Pf          |  |  |  |  |  |  |
| Eastern | Busia      | Moderate | 0.55601 | 34.11851 | Female | 9  | D944 | 1 | Positive | Positive | 317   | Postive  | Pf          |  |  |  |  |  |  |
| Eastern | Busia      | Moderate | 0.24851 | 33.989   | Female | 3  | E119 | 1 | Positive | Positive | 4240  | Postive  | Pf          |  |  |  |  |  |  |
| Eastern | Busia      | Moderate | 0.4241  | 33.97776 | Male   | 7  | E056 | 1 | Positive | Positive | 2480  | Postive  | Pf          |  |  |  |  |  |  |
| Eastern | Manafwa    | Low      | 0.95901 | 34.29031 | Male   | 3  | B626 | 1 | Positive | Positive | 40268 | Postive  | Pf          |  |  |  |  |  |  |
| Eastern | Manafwa    | Low      | 0.91703 | 34.32143 | Male   | 3  | B510 | 1 | Positive | Positive | 20960 | Postive  | Pf          |  |  |  |  |  |  |
| Eastern | Manafwa    | Low      | 0.99316 | 34.31573 | Female | 7  | B698 | 1 | Positive | Positive | 1840  | Postive  | Pf          |  |  |  |  |  |  |
| Eastern | Manafwa    | Low      | 0.88865 | 34.31733 | Male   | 2  | B752 | 1 | Positive | Positive | 4800  | Postive  | Pf          |  |  |  |  |  |  |
| Eastern | Manafwa    | Low      | 1.02342 | 34.32527 | Female | 9  | B890 | 1 | Positive | Positive | 520   | Postive  | Pf          |  |  |  |  |  |  |
| Eastern | Bududa     | Low      | 0.99455 | 34.35652 | Female | 6  | B812 | 1 | Positive | Positive | 16000 | Postive  | Pf          |  |  |  |  |  |  |
| Eastern | Sironko    | Low      | 1.18094 | 34.32071 | Female | 7  | A901 | 1 | Positive | Positive | 2480  | Postive  | Pf          |  |  |  |  |  |  |
| Eastern | Sironko    | Low      | 1.18018 | 34.32337 | Female | 3  | A905 | 1 | Positive | Positive | 16000 | Postive  | Pf          |  |  |  |  |  |  |
| Eastern | Sironko    | Low      | 1.16764 | 34.26906 | Male   | 4  | B116 | 1 | Positive | Positive | 3680  | Postive  | Pf          |  |  |  |  |  |  |
| Eastern | Sironko    | Low      | 1.12154 | 34.2832  | Male   | 8  | B073 | 1 | Positive | Positive | 520   | Postive  | Pf          |  |  |  |  |  |  |
| Eastern | Kapchorwa  | Low      | 1.31668 | 34.33881 | Male   | 2  | E983 | 1 | Positive | Positive | 128   | Postive  | Pf          |  |  |  |  |  |  |
| Western | Mitooma    | Low      | -0.5329 | 30.01562 | Female | 2  | M441 | 1 | Positive | Positive | 920   | Postive  | Pf          |  |  |  |  |  |  |
| Western | Mitooma    | Low      | -0.7137 | 29.99595 | Female | 4  | M470 | 1 | Positive | Positive | 4360  | Postive  | Pf          |  |  |  |  |  |  |
| Western | Hoima      | Low      | 1.50998 | 31.34571 | Male   | 4  | K230 | 1 | Positive | Positive | 2000  | Postive  | Pf          |  |  |  |  |  |  |
| Western | Hoima      | Low      | 1.50998 | 31.34571 | Male   | 7  | K229 | 1 | Positive | Positive | 9480  | Postive  | Pf          |  |  |  |  |  |  |
| Western | Hoima      | Low      | 1.47594 | 31.32535 | Female | 4  | K480 | 1 | Positive | Positive | 7680  | Postive  | Pf          |  |  |  |  |  |  |
| Western | Hoima      | Low      | 1.40173 | 31.2747  | Male   | 7  | K500 | 1 | Positive | Positive | 80    | Postive  | Pf          |  |  |  |  |  |  |

|          |            |          |         |          |        |    |      |   |          |          |        |          |     |  |  |  |  |  |  |   |
|----------|------------|----------|---------|----------|--------|----|------|---|----------|----------|--------|----------|-----|--|--|--|--|--|--|---|
| Western  | Kyegegwa   | Low      | 0.66131 | 30.93671 | Male   | 2  | P190 | 1 | Positive | Positive | 47560  | Positive | Pf  |  |  |  |  |  |  |   |
| Western  | Kyegegwa   | Low      | 0.45352 | 31.0458  | Female | 2  | P173 | 1 | Positive | Positive | 1920   | Positive | Pf  |  |  |  |  |  |  |   |
| Western  | Kabarole   | Low      | 0.47816 | 30.16346 | Male   | 2  | L083 | 1 | Positive | Positive | 5040   | Positive | Pf  |  |  |  |  |  |  |   |
| Western  | Kabarole   | Low      | 0.38093 | 30.22084 | Female | 5  | L094 | 1 | Positive | Positive | 32     | Positive | Pf  |  |  |  |  |  |  |   |
| Western  | Ntoroko    | Low      | 0.87016 | 30.23189 | Female | 8  | C722 | 1 | Positive | Positive | 41780  | Positive | Pf  |  |  |  |  |  |  |   |
| Western  | Kyenjojo   | Low      | 0.8501  | 30.72111 | Female | 4  | P699 | 1 | Positive | Positive | 65669  | Positive | Pf  |  |  |  |  |  |  |   |
| Western  | Kyenjojo   | Low      | 0.84009 | 30.56264 | Male   | 7  | P675 | 1 | Positive | Positive | 8080   | Positive | Pf  |  |  |  |  |  |  |   |
| Western  | Kyenjojo   | Low      | 0.56457 | 30.60386 | Male   | 4  | P895 | 1 | Positive | Positive | 26400  | Positive | Pf  |  |  |  |  |  |  |   |
| Western  | Kyenjojo   | Low      | 0.41972 | 30.65842 | Female | 3  | P850 | 1 | Positive | Positive | 88000  | Positive | Pf  |  |  |  |  |  |  |   |
| Western  | Bundibugyo | Low      | 0.79703 | 30.12714 | Female | 4  | G695 | 1 | Positive | Positive | 2720   | Positive | Pf  |  |  |  |  |  |  |   |
| Western  | Bundibugyo | Low      | 0.62527 | 30.0347  | Male   | 10 | G644 | 1 | Positive | Positive | 520    | Positive | Pf  |  |  |  |  |  |  |   |
| Western  | Bulisa     | Low      | 1.83845 | 31.38195 | Female | 10 | B977 | 1 | Positive | Positive | 5000   | Positive | Pf  |  |  |  |  |  |  |   |
| Western  | Bundibugyo | Low      | 0.69973 | 29.9853  | Female | 2  | G776 | 1 | Positive | Positive | 48440  | Positive | Pf  |  |  |  |  |  |  |   |
| Western  | Bulisa     | Low      | 1.73044 | 31.46258 | Male   | 4  | B967 | 1 | Positive | Positive | 70000  | Positive | Pf  |  |  |  |  |  |  |   |
| Western  | Isingiro   | Low      | -0.8099 | 31.12836 | Male   | 5  | M045 | 1 | Positive | Positive | 82920  | Positive | Pf  |  |  |  |  |  |  |   |
| Western  | Isingiro   | Low      | -0.9044 | 30.67262 | Male   | 4  | M378 | 1 | Positive | Positive | 96     | Positive | Pf  |  |  |  |  |  |  |   |
| Western  | Isingiro   | Low      | -0.7182 | 30.85977 | Male   | 6  | M192 | 1 | Positive | Positive | 5120   | Positive | Pf  |  |  |  |  |  |  |   |
| Western  | Isingiro   | Low      | -0.7895 | 30.66052 | Male   | 5  | M180 | 1 | Positive | Positive | 8000   | Positive | Pf  |  |  |  |  |  |  |   |
| Western  | Isingiro   | Low      | -0.9517 | 31.05489 | Female | 7  | L978 | 1 | Positive | Positive | 48     | Positive | Pf  |  |  |  |  |  |  |   |
| Western  | Ibanda     | Low      | -0.2244 | 30.58273 | Male   | 5  | J023 | 1 | Positive | Positive | 31360  | Positive | Pf  |  |  |  |  |  |  |   |
| Western  | Ibanda     | Low      | -0.1369 | 30.46338 | Male   | 5  | J055 | 1 | Positive | Positive | 2080   | Positive | Pf  |  |  |  |  |  |  |   |
| Western  | Bushenyi   | Low      | -0.8069 | 30.26324 | Female | 2  | K938 | 1 | Positive | Positive | 2720   | Positive | Pf  |  |  |  |  |  |  |   |
| Western  | Bushenyi   | Low      | -0.4487 | 30.19371 | Female | 7  | K770 | 1 | Positive | Positive | 18760  | Positive | Pf  |  |  |  |  |  |  |   |
| Western  | Mbarara    | Low      | -0.3979 | 30.52647 | Female | 10 | L545 | 1 | Positive | Positive | 520    | Positive | Pf  |  |  |  |  |  |  |   |
| Western  | Kanungu    | Low      | -0.6927 | 29.70103 | Female | 4  | Q118 | 1 | Positive | Positive | 22240  | Positive | Pf  |  |  |  |  |  |  |   |
| Western  | Kanungu    | Low      | -0.8038 | 29.69265 | Female | 10 | P983 | 1 | Positive | Positive | 76560  | Positive | Pf  |  |  |  |  |  |  |   |
| Western  | Kanungu    | Low      | -0.6977 | 29.70518 | Male   | 6  | Q113 | 1 | Positive | Positive | 71160  | Positive | Pf  |  |  |  |  |  |  | 1 |
| Western  | Bushenyi   | Low      | -0.5312 | 30.15977 | Male   | 5  | K631 | 1 | Positive | Positive | 5500   | Positive | Pf  |  |  |  |  |  |  |   |
| Western  | Kanungu    | Low      | -0.8038 | 29.69265 | Female | 5  | P984 | 1 | Positive | Positive | 27840  | Positive | Pf  |  |  |  |  |  |  |   |
| Western  | Bushenyi   | Low      | -0.6034 | 30.26017 | Male   | 2  | K935 | 1 | Positive | Positive | 760    | Positive | Pf  |  |  |  |  |  |  |   |
| Western  | Rukungiri  | Low      | -0.5994 | 29.85703 | Male   | 5  | P361 | 1 | Positive | Positive | 65360  | Positive | Pf  |  |  |  |  |  |  |   |
| Western  | Rukungiri  | Low      | -0.5994 | 29.85703 | Male   | 7  | P360 | 1 | Positive | Positive | 62200  | Positive | Pf  |  |  |  |  |  |  |   |
| Western  | Iganga     | Moderate | -0.8484 | 29.92874 | Male   | 5  | P206 | 1 | Positive | Positive | 320    | Positive | Pf  |  |  |  |  |  |  | 1 |
| Eastern  | Namayingo  | Low      | 0.28986 | 33.85029 | Female | 10 | C854 | 1 | Positive | Positive | 8640   | Positive | Pf  |  |  |  |  |  |  |   |
| Western  | Bundibugyo | Low      | 0.67438 | 30.00245 | Male   | 6  | G857 | 1 | Positive | Positive | 43892  | Positive | Pf  |  |  |  |  |  |  |   |
| Western  | Ntoroko    | Low      | 0.94067 | 30.19045 | Male   | 5  | C770 | 1 | Positive | Positive | 10600  | Positive | Pf  |  |  |  |  |  |  |   |
| Eastern  | Iganga     | Moderate | 0.77098 | 33.4003  | Male   | 4  | E525 | 1 | Positive | Positive | 1936   | Positive | Pf  |  |  |  |  |  |  |   |
| Northern | Kumi       | Low      | 1.38831 | 33.94136 | Female | 7  | A006 | 2 | Positive | Positive | 3834   | Positive | Pf  |  |  |  |  |  |  |   |
| Eastern  | Iganga     | Moderate | 0.61738 | 33.47086 | Female | 8  | E353 | 2 | Positive | Positive | 1280   | Positive | Pf  |  |  |  |  |  |  |   |
| Eastern  | Iganga     | Moderate | 0.6823  | 33.4515  | Female | 5  | E704 | 2 | Positive | Positive | 4320   | Positive | Pf  |  |  |  |  |  |  |   |
| Western  | Ntoroko    | Low      | 0.85308 | 30.22368 | Female | 10 | C764 | 2 | Positive | Positive | 80     | Positive | Pf  |  |  |  |  |  |  |   |
| Eastern  | Bulambuli  | Low      | 1.31968 | 34.25753 | Female | 7  | B204 | 2 | Positive | Positive | 19320  | Positive | Pf  |  |  |  |  |  |  |   |
| Eastern  | Mbale      | Low      | 1.01961 | 34.19998 | Female | 10 | G172 | 2 | Positive | Positive | 1056   | Positive | Pf  |  |  |  |  |  |  |   |
| Western  | Kakumiro   | Low      | 1.16302 | 31.17177 | Female | 5  | Q267 | 2 | Positive | Positive | 2380   | Positive | Pf  |  |  |  |  |  |  |   |
| Western  | Rubizi     | Low      | -0.2715 | 30.08116 | Male   | 7  | M882 | 2 | Positive | Positive | 8040   | Positive | Pf  |  |  |  |  |  |  |   |
| Western  | Rubizi     | Low      | -0.2399 | 30.18295 | Male   | 2  | N064 | 2 | Positive | Positive | 8720   | Positive | Pf  |  |  |  |  |  |  |   |
| Eastern  | Busia      | Moderate | 0.3217  | 33.96199 | Female | 8  | D912 | 2 | Positive | Positive | 6840   | Positive | Pf  |  |  |  |  |  |  |   |
| Eastern  | Namayingo  | Moderate | 0.3281  | 33.83659 | Male   | 4  | C875 | 2 | Positive | Positive | 3680   | Positive | Pf  |  |  |  |  |  |  |   |
| Eastern  | Mayuge     | Moderate | 0.28396 | 33.53331 | Male   | 3  | F591 | 2 | Positive | Positive | 680    | Positive | Pf  |  |  |  |  |  |  |   |
| Western  | Kanungu    | Low      | -0.8072 | 29.69177 | Male   | 7  | Q073 | 2 | Positive | Positive | 480    | Positive | Pf  |  |  |  |  |  |  |   |
| Western  | Isingiro   | Low      | -0.7007 | 31.0635  | Male   | 7  | L990 | 2 | Positive | Positive | 3080   | Positive | Pf  |  |  |  |  |  |  |   |
| Western  | Bundibugyo | Low      | 0.59635 | 29.99236 | Female | 4  | G603 | 2 | Positive | Positive | 5184   | Positive | Pf  |  |  |  |  |  |  |   |
| Western  | Kabarole   | Low      | 0.54197 | 30.2173  | Female | 10 | L065 | 2 | Positive | Positive | 1386   | Positive | Pf  |  |  |  |  |  |  |   |
| Eastern  | Buyende    | Low      | 1.06471 | 33.27607 | Female | 7  | G541 | 2 | Positive | Positive | 346    | Positive | Pf  |  |  |  |  |  |  |   |
| Eastern  | Kabarole   | Moderate | 0.4504  | 33.22792 | Male   | 7  | D165 | 2 | Positive | Positive | 2080   | Positive | Pf  |  |  |  |  |  |  |   |
| Western  | Kasese     | Low      | 0.22511 | 30.11574 | Male   | 5  | K029 | 2 | Positive | Positive | 32     | Positive | Pf  |  |  |  |  |  |  |   |
| Western  | Kyegegwa   | Low      | 0.65171 | 30.97767 | Male   | 9  | P075 | 2 | Positive | Positive | 4000   | Positive | Pf  |  |  |  |  |  |  |   |
| Eastern  | Manafwa    | Low      | 0.85175 | 34.32883 | Female | 2  | B503 | 2 | Positive | Positive | 334    | Negative | neg |  |  |  |  |  |  |   |
| Eastern  | Kamuli     | Moderate | 0.8334  | 33.14948 | Male   | 6  | D673 | 2 | Positive | Positive | 4350   | Positive | Pf  |  |  |  |  |  |  |   |
| Eastern  | Jinja      | Moderate | 0.57549 | 33.11371 | Male   | 6  | D339 | 2 | Positive | Positive | 57320  | Positive | Pf  |  |  |  |  |  |  |   |
| Eastern  | Manafwa    | Low      | 0.90563 | 34.24259 | Male   | 5  | B725 | 2 | Positive | Positive | 800    | Positive | Pf  |  |  |  |  |  |  |   |
| Western  | Kiruhura   | Low      | -0.1642 | 30.63282 | Female | 2  | J337 | 2 | Positive | Positive | 176    | Positive | Pf  |  |  |  |  |  |  |   |
| Eastern  | Kamuli     | Moderate | 0.69444 | 33.07265 | Male   | 10 | D620 | 2 | Positive | Positive | 638    | Positive | Pf  |  |  |  |  |  |  |   |
| Western  | Kanungu    | Low      | -0.7044 | 29.70521 | Female | 4  | Q102 | 2 | Positive | Positive | 2640   | Positive | Pf  |  |  |  |  |  |  |   |
| Western  | Masindi    | Low      | 1.6637  | 31.62317 | Male   | 7  | C567 | 2 | Positive | Positive | 11200  | Positive | Pf  |  |  |  |  |  |  |   |
| Northern | Amuria     | Low      | 1.91919 | 33.78849 | Male   | 2  | A181 | 2 | Positive | Positive | 3920   | Positive | Pf  |  |  |  |  |  |  |   |
| Eastern  | Sironko    | Low      | 1.22912 | 34.24738 | Female | 3  | B098 | 2 | Positive | Positive | 985    | Positive | Pf  |  |  |  |  |  |  |   |
| Western  | Bundibugyo | Low      | 0.59635 | 29.99236 | Male   | 7  | G602 | 2 | Positive | Positive | 8720   | Positive | Pf  |  |  |  |  |  |  | 1 |
| Western  | Kakumiro   | Low      | 1.0044  | 31.17001 | Male   | 10 | Q327 | 2 | Positive | Positive | 400    | Positive | Pf  |  |  |  |  |  |  |   |
| Western  | Kagadi     | Low      | 1.09884 | 30.97836 | Female | 6  | O772 | 2 | Positive | Positive | 2240   | Positive | Pf  |  |  |  |  |  |  |   |
| Eastern  | Jinja      | Moderate | 0.46506 | 33.26938 | Male   | 3  | D118 | 2 | Positive | Positive | 5320   | Positive | Pf  |  |  |  |  |  |  |   |
| Eastern  | Sironko    | Low      | 1.18108 | 34.31945 | Female | 8  | A917 | 2 | Positive | Positive | 2800   | Positive | Pf  |  |  |  |  |  |  |   |
| Eastern  | Iganga     | Moderate | 0.69097 | 33.64584 | Male   | 8  | E229 | 2 | Positive | Positive | 1360   | Positive | Pf  |  |  |  |  |  |  |   |
| Eastern  | Kaliro     | Moderate | 1.01711 | 33.41058 | Female | 2  | F730 | 2 | Positive | Positive | 13320  | Positive | Pf  |  |  |  |  |  |  |   |
| Eastern  | Mbale      | Low      | 1.06919 | 34.20425 | Female | 9  | G383 | 2 | Positive | Positive | 1120   | Positive | Pf  |  |  |  |  |  |  |   |
| Western  | Hoima      | Low      | 1.24794 | 30.81617 | Female | 3  | K381 | 2 | Positive | Positive | 7160   | Positive | Pf  |  |  |  |  |  |  |   |
| Western  | Ntungamo   | Low      | -0.9241 | 30.45942 | Male   | 10 | N849 | 2 | Positive | Positive | 176    | Positive | Pf  |  |  |  |  |  |  |   |
| Western  | Ntoroko    | Low      | 1.05278 | 30.53763 | Female | 7  | C702 | 2 | Positive | Positive | 3240   | Positive | Pf  |  |  |  |  |  |  |   |
| Western  | Kamwengeye | Low      | 0.15096 | 30.43585 | Male   | 10 | N304 | 2 | Positive | Positive | 47480  | Positive | Pf  |  |  |  |  |  |  |   |
| Eastern  | Mayuge     | Moderate | 0.47335 | 33.48334 | Female | 3  | F430 | 2 | Positive | Positive | 16     | Positive | Pf  |  |  |  |  |  |  |   |
| Eastern  | Mayuge     | Moderate | 0.41658 | 33.48012 | Male   | 3  | F320 | 2 | Positive | Positive | 109160 | Positive | Pf  |  |  |  |  |  |  |   |
| Eastern  | Mbale      | Low      | 1.11249 | 34.2552  | Male   | 10 | G084 | 2 | Positive | Positive | 1780   | Positive | Pf  |  |  |  |  |  |  |   |
| Western  | Kiruhura   | Low      | 0.19238 | 30.77905 | Male   | 5  | L197 | 2 | Positive | Positive | 48     | Positive | Pf  |  |  |  |  |  |  |   |
| Western  | Bundibugyo | Low      | 0.67315 | 30.01224 | Male   | 7  | G774 | 2 | Positive | Positive | 25200  | Positive | Pf  |  |  |  |  |  |  |   |
| Western  | Kisoro     | Low      | -1.1155 | 29.65096 | Female | 9  | R303 | 2 | Positive | Positive | 640    | Positive | Pf  |  |  |  |  |  |  |   |
| Eastern  | Soroti     | Low      | 1.63359 | 33.57855 | Female | 7  | A527 | 2 | Positive | Positive | 39560  | Positive | Pf  |  |  |  |  |  |  |   |
| Western  | Hoima      | Low      | 1.46735 | 31.32048 | Female | 4  | K469 | 2 | Positive | Positive | 2080   | Positive | Pf  |  |  |  |  |  |  |   |
| Eastern  | Namayingo  | Moderate | 0.24858 | 33.88629 | Male   | 3  | C873 | 1 | Positive | Positive | 56504  | Positive | Pf  |  |  |  |  |  |  |   |
| Western  | Kasese     | Low      | 0.69666 | 30.44282 | Male   | 10 | P707 | 2 | Positive | Positive | 47040  | Positive | Pf  |  |  |  |  |  |  |   |
| Eastern  | Mayuge     | Low      | 1.02385 | 31.45147 | Female | 9  | Q403 | 2 | Positive | Positive | 47     | Positive | Pf  |  |  |  |  |  |  | 1 |
| Eastern  | Mayuge     | Moderate | 0.62044 | 33.61855 | Male   |    |      |   |          |          |        |          |     |  |  |  |  |  |  |   |
